# Supplementary material for: Bioclipse: an open source workbench for chemo- and bioinformatics
Source: Springer Nature journal article supplement (doi:10.1186/1471-2105-8-59), 2007-02-22

## Bioclipse primary plugin

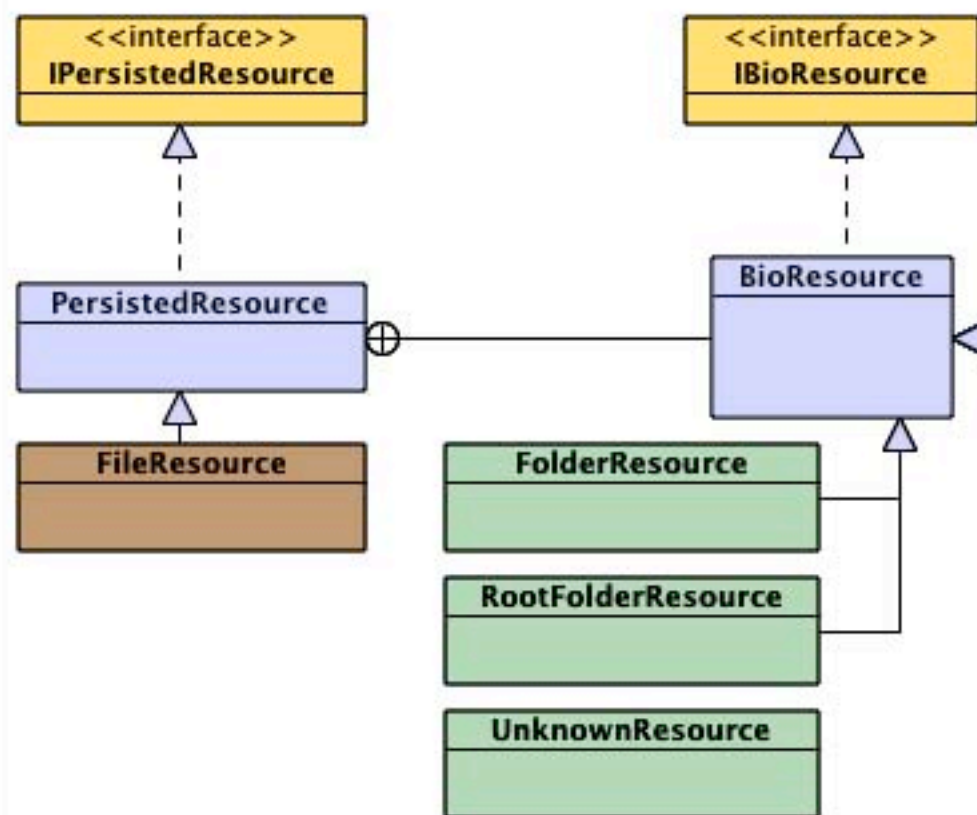

## External plugins

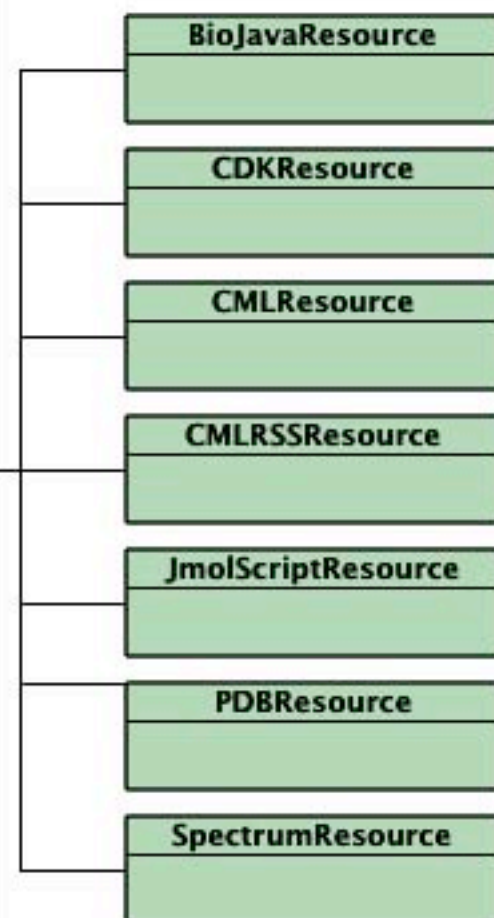

Supplement: 12859_2006_1431_MOESM2_ESM.pdf [file 12859_2006_1431_MOESM2_ESM.pdf]
