# Supplementary material for: Bioclipse: an open source workbench for chemo- and bioinformatics
Source: Springer Nature journal article supplement (doi:10.1186/1471-2105-8-59), 2007-02-22
Supplement: 12859_2006_1431_MOESM3_ESM.pdf [file 12859_2006_1431_MOESM3_ESM.pdf]

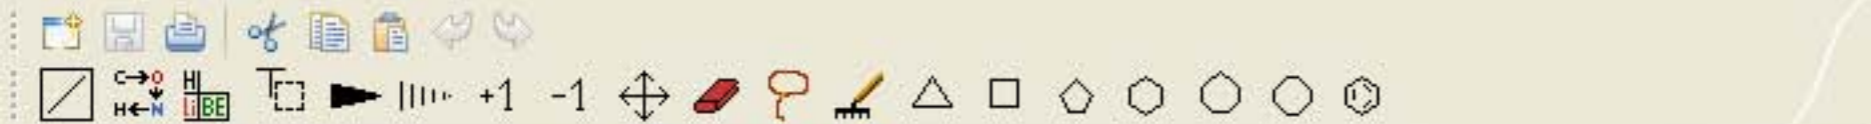

BioResource Navigator

- pdb
  - 1ale.pdb
  - 1D66.pdb
  - 2PRG.pdb
  - penicillin.pdb
  - viagra.pdb
  - zif268.pdb
- sequences
- spectra
  - aug07.dx
  - cpd01.jdx
  - eupatoriochromene.cm
  - Maaranolide\_G.smr
  - Manaarenolide\_H.smr
  - Manaarenolide\_I.smr
  - spectrum1.xml
  - spectrum2.xml
  - spectrum2-local.xml
  - spectrum3.xml
  - spectrum4.xml
  - spectrumList1.xml
  - spectrumList2.xml
  - strychnine\_jcamp-dx5.
- ATP.mol
- C00020.mol
- C05441.mol
- cmlspect.bib
- polycarpol.mol
- reserpine.mol
- showSecondaryProteinStru
- testedfeeds.opml
- thiamin.mol
- viagra.xyz

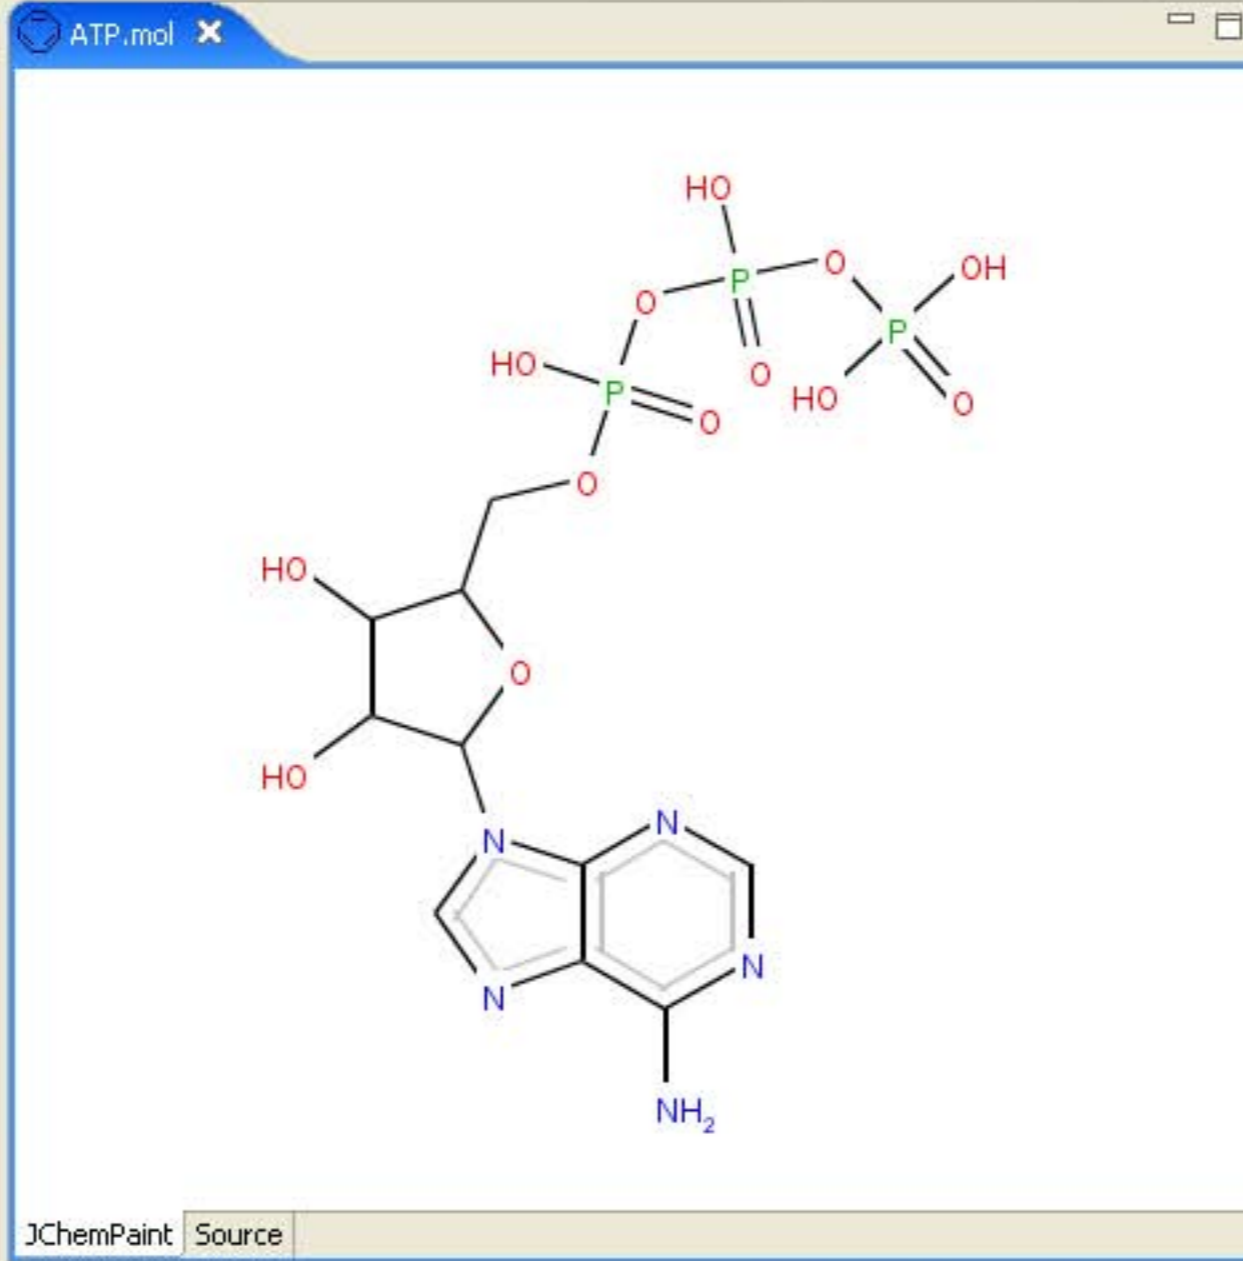

Console

```

Bioclipse console
Console initiated
Parsed file in 420 ms.
'ATP.mol' loaded and parsed successfully.
  
```

ChemTree

- ChemFile
  - ChemSequence
    - ChemModel
      - MoleculeSet
        - Molecule
          - Atom N
          - Atom C
          - Atom N
          - Atom C

Properties

| Property       | Value                                |
|----------------|--------------------------------------|
| CDK            |                                      |
| Atom count     | 31                                   |
| Bond count     | 33                                   |
| File format    | MDL Molfile                          |
| Formula        | C10N5O13P3                           |
| InChI          | N/A                                  |
| Mass           | 490.87045                            |
| Natural mass   | 491.05478                            |
| SMILES         | Nc3ncnc1c3(ncn1C2OC(COP(O)(...       |
| Strand count   |                                      |
| General        |                                      |
| Format         | MDL Molfile                          |
| Name           | ATP.mol                              |
| Parent         | N/A                                  |
| Path           | E:\development\bc_data\data\s...     |
| Persisted type | net.bioclipse.model.resources.Fil... |
| Size           | 2,90 kB                              |
| Type           | CDK Resource                         |
